# Supplementary figures and images for: Real-world study of afatinib in first-line or re-challenge settings for patients with EGFR mutant non-small cell lung cancer
Source: Springer Nature journal article supplement (doi:10.1007/s12032-019-1278-9), 2019-05-14

Supplementary Figure.1

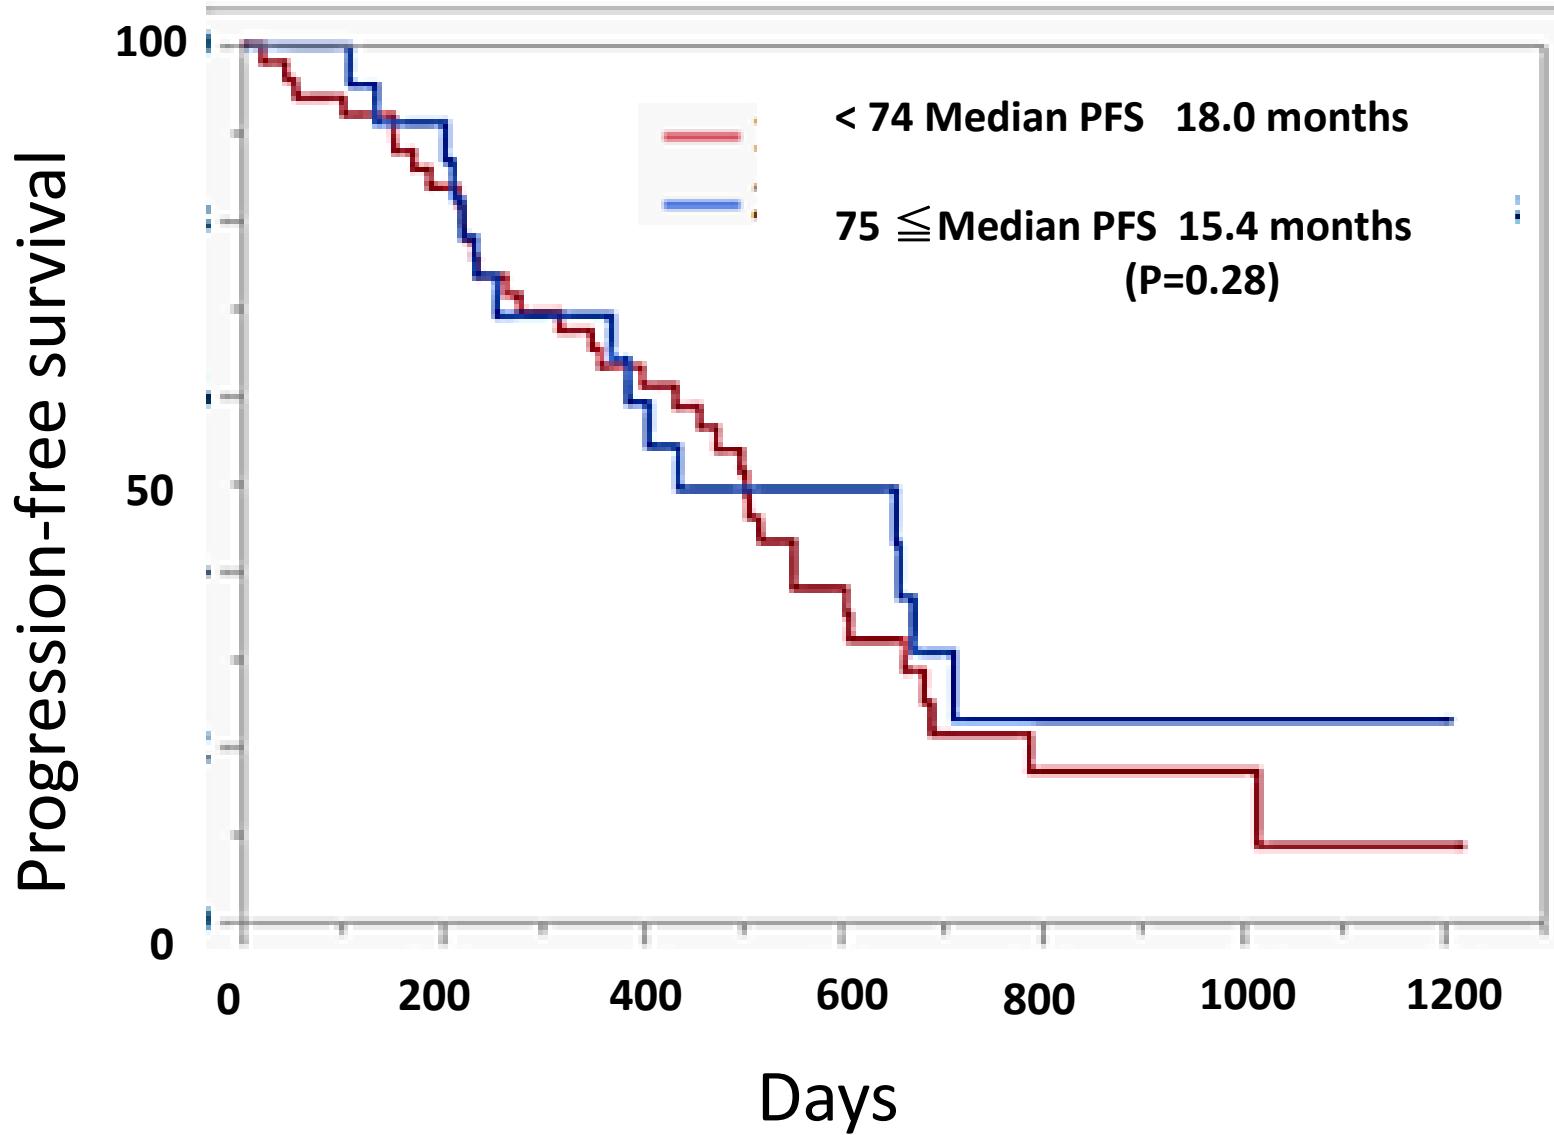

Supplement: MOESM1 [file 16722324]

# Supplementary Figure.2

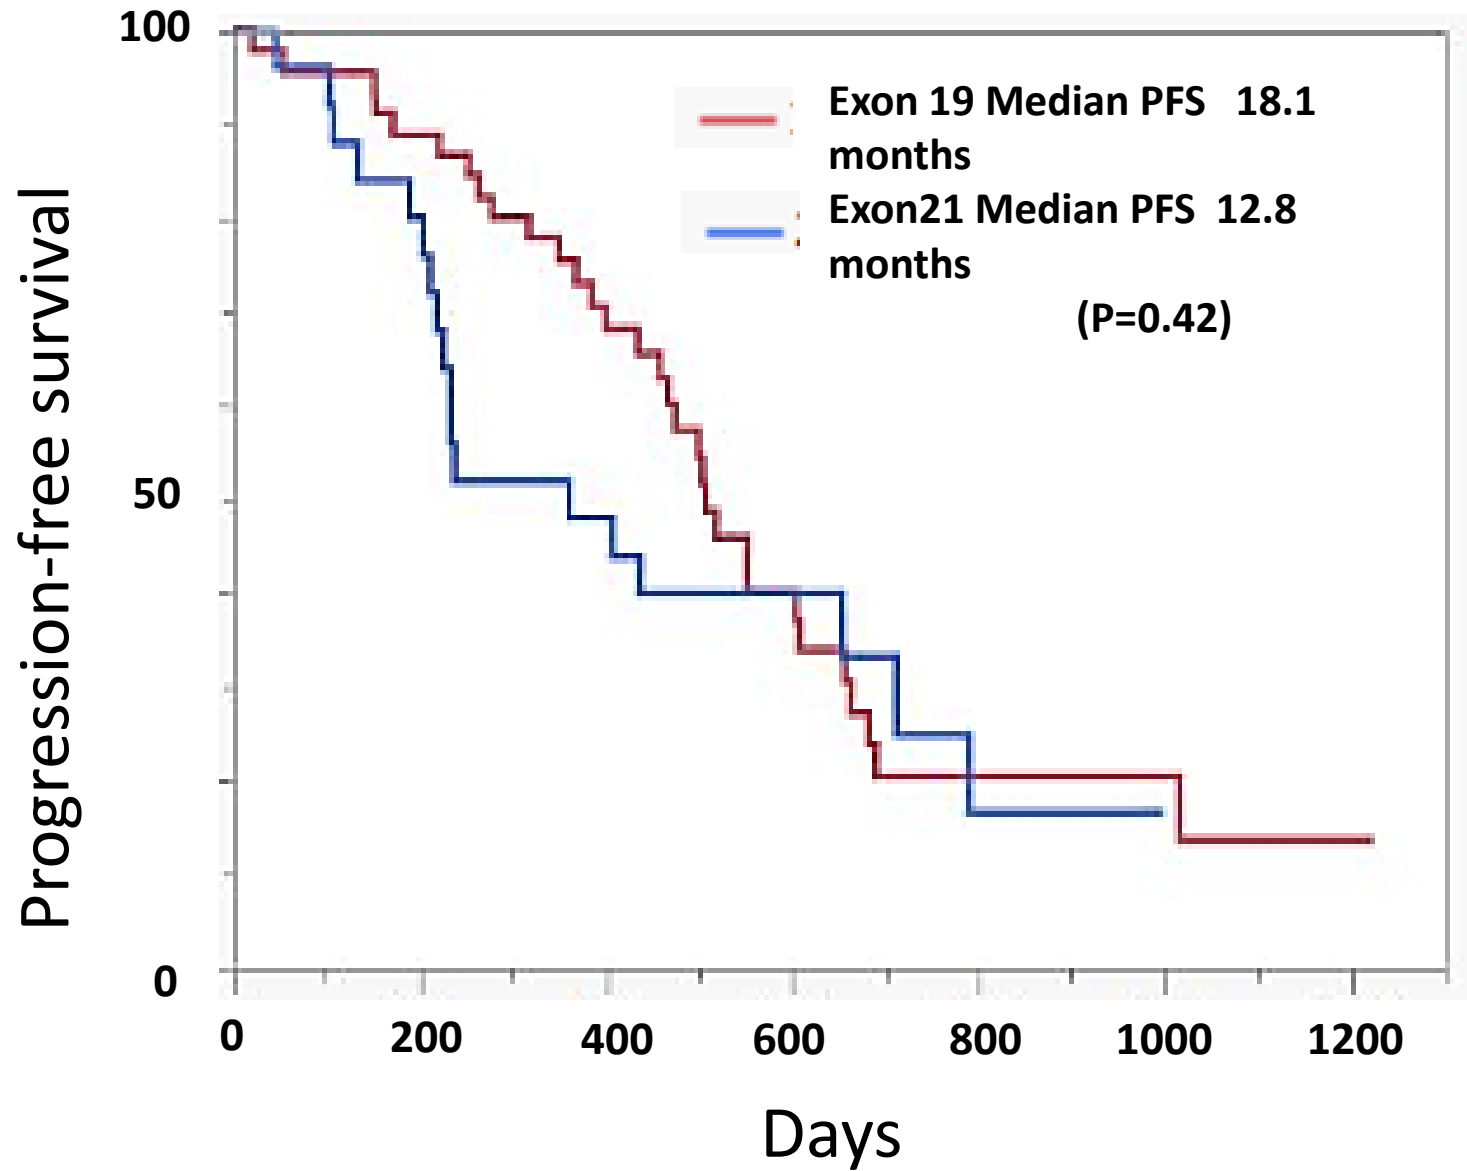

Supplement: MOESM2 [file 16722324]

# Supplementary Figure. 3

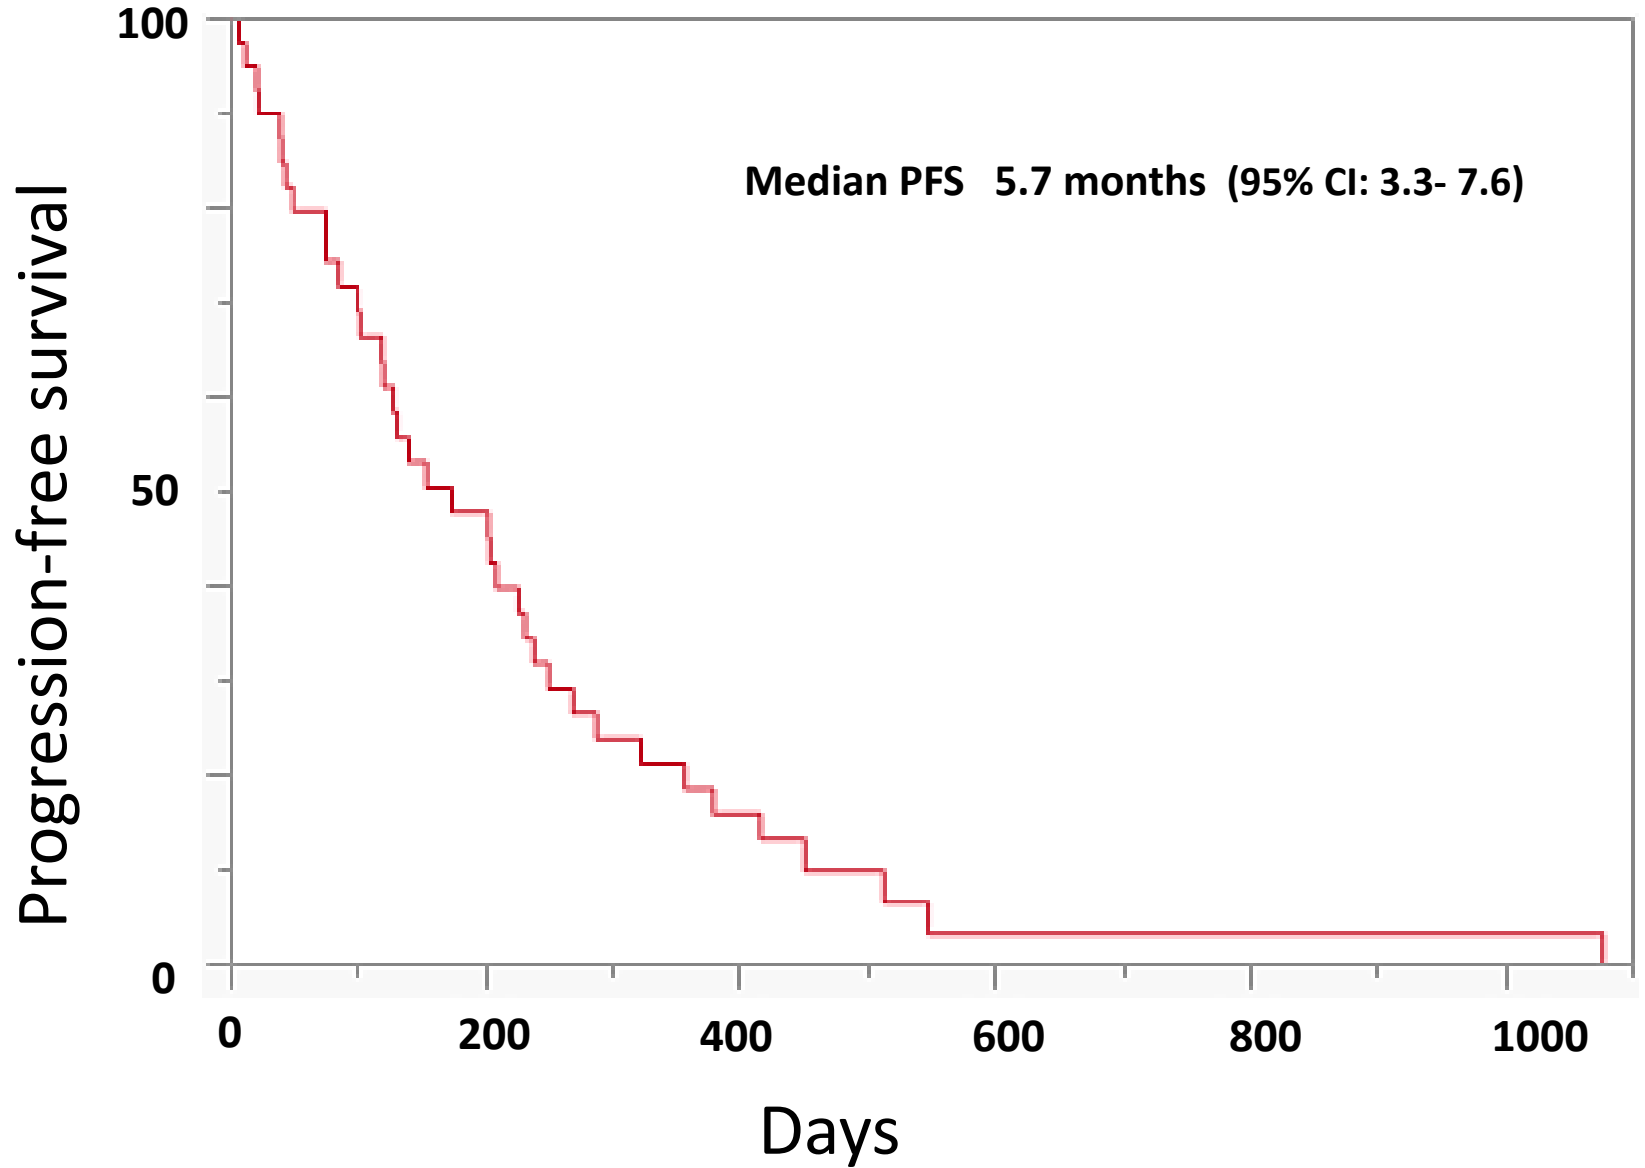

Supplement: MOESM3 [file 16722324]

Supplementary Figure. 4

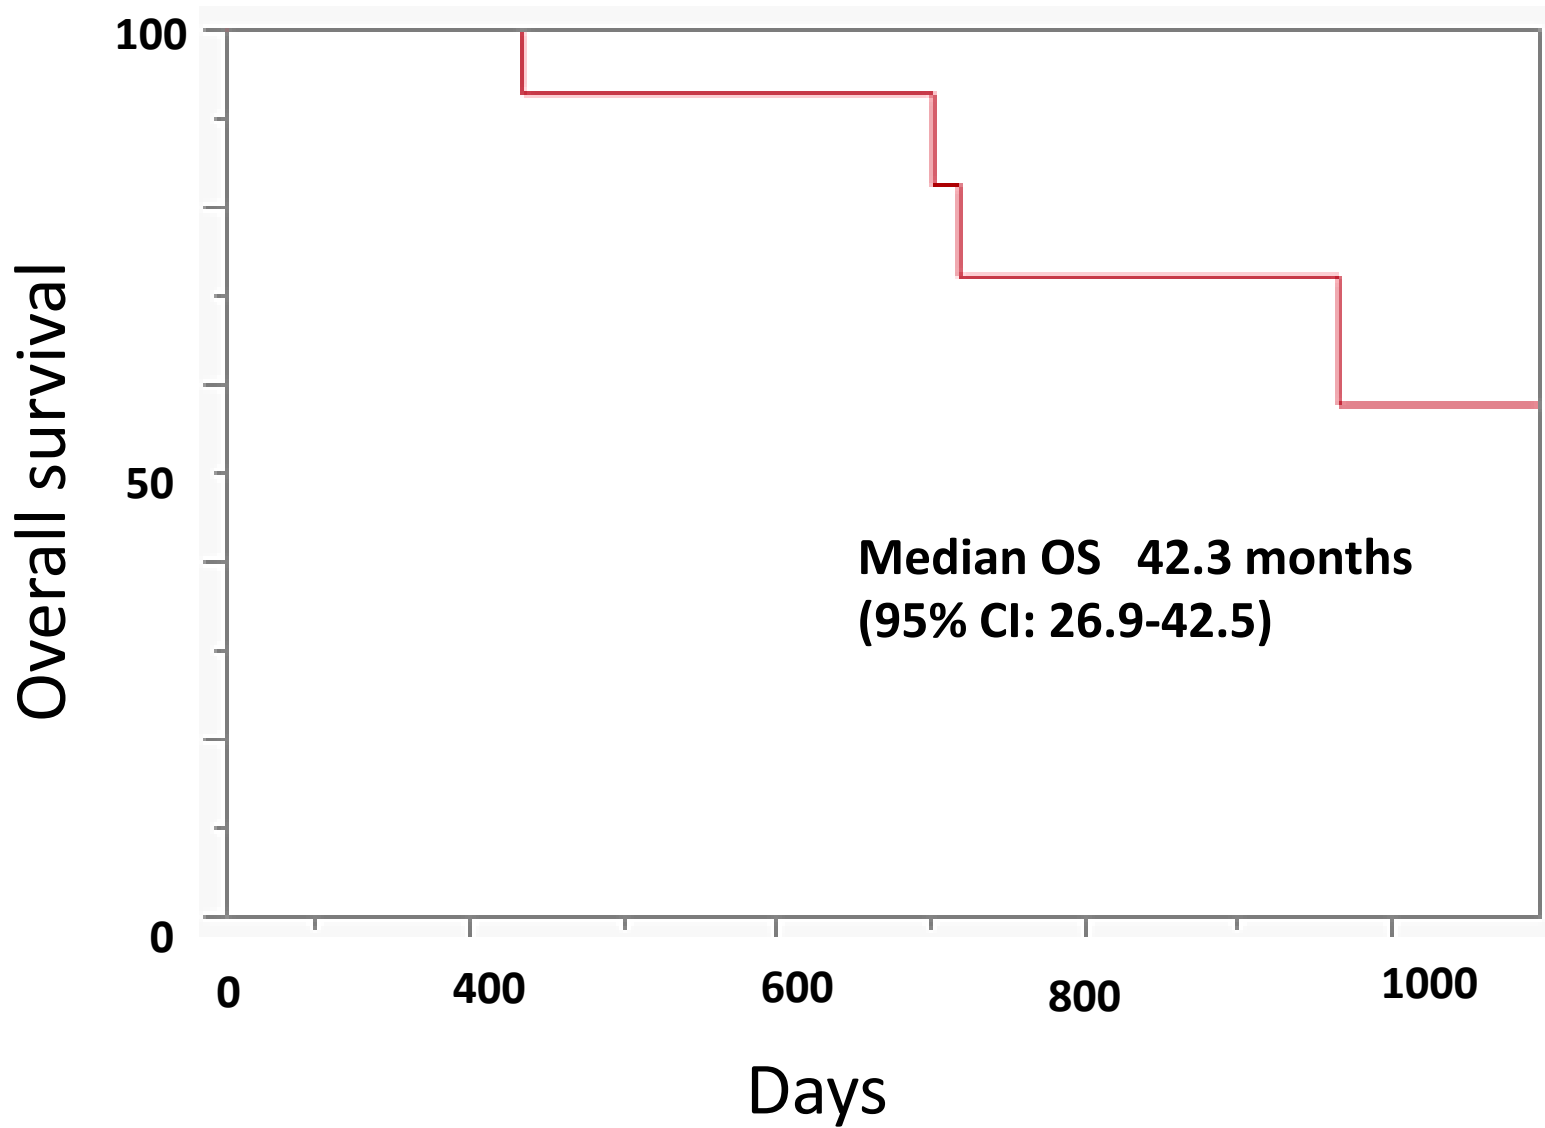

Supplement: MOESM4 [file 16722324]
